# Supplementary material
Source: MDPI journal article supplement (https://www.mdpi.com/2073-4344/8/1/20)
Supplement: s1 [file s1]

# Supplementary Materials: Promoting Role of Bismuth on Hydrotalcite-Supported Platinum Catalysts in Aqueous Phase Oxidation of Glycerol to Dihydroxyacetone

Wenjie Xue <sup>1</sup>, Zenglong Wang <sup>1</sup>, Yu Liang <sup>1</sup>, Hong Xu <sup>1</sup>, Lei Liu <sup>1,\*</sup>, Jinxiang Dong <sup>1,2</sup>

## 2. Results and Discussion

### 2.1. Catalyst Characterization

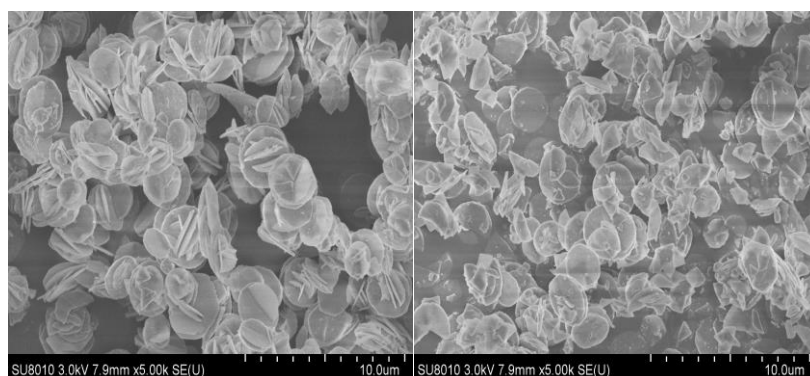

**Figure S1.** SEM images of the as-synthesized Mg-Al HT (left) and the Pt-7Bi/HT (right).

### 2.2.4. Catalyst Recycling

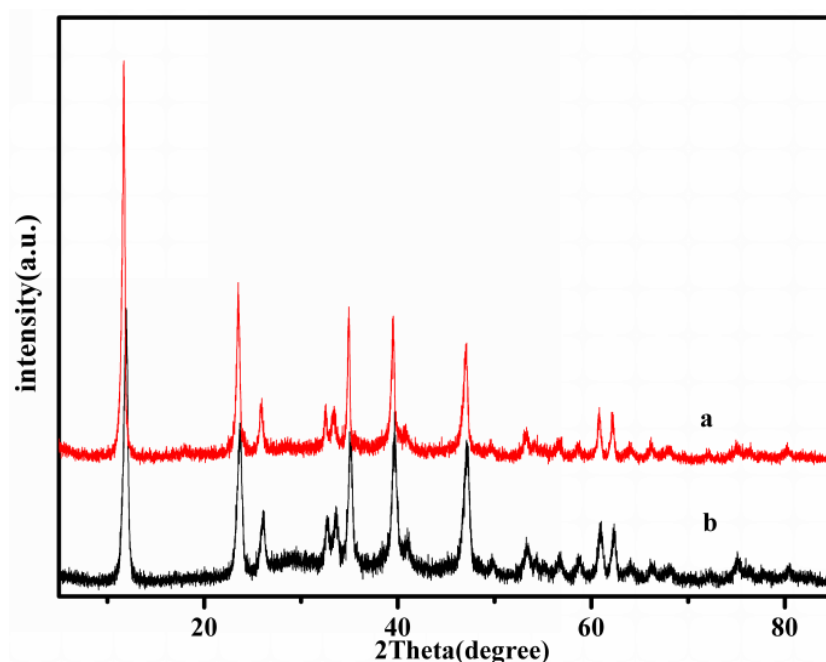

**Figure S2.** Powder XRD patterns of (a) Pt-7Bi/HT catalyst after 2<sup>nd</sup> reaction, (b) Pt-7Bi/HT fresh catalyst

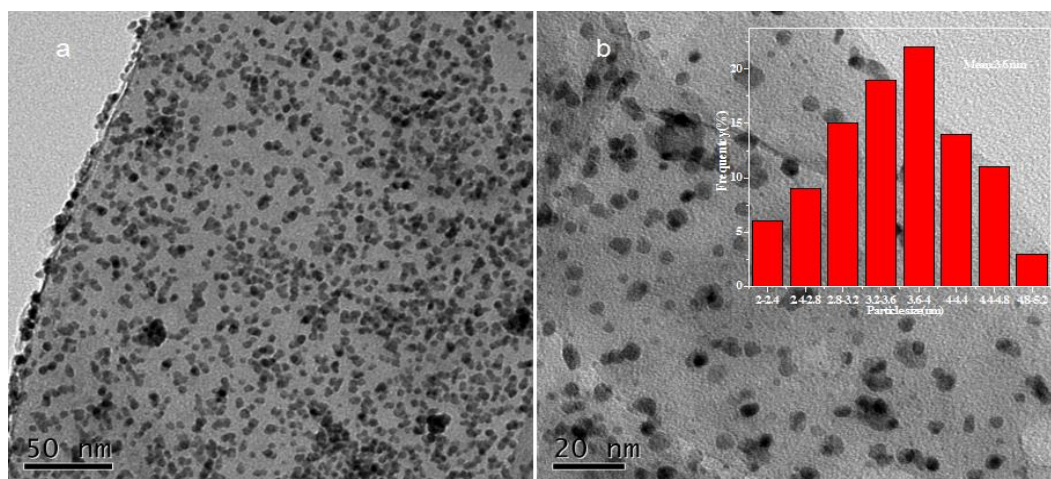

**Figure S3.** HR-TEM images and particle size distribution histograms for Pt-7Bi/ HT catalyst after 2<sup>nd</sup> reaction.
